# Supplementary material
Source: PubMed Central journal article supplement (PMC2330286)
Supplement: plntphys_pp.108.116889_1.pdf [file plntphys_pp.108.116889_1.pdf]

a)

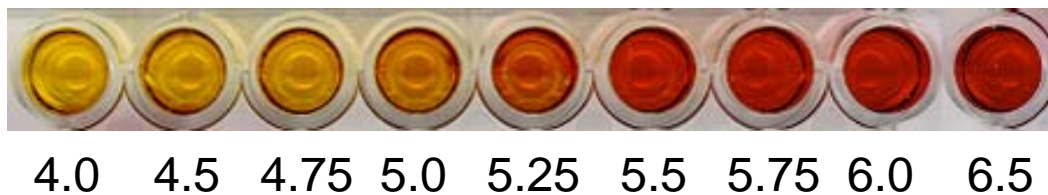

b)

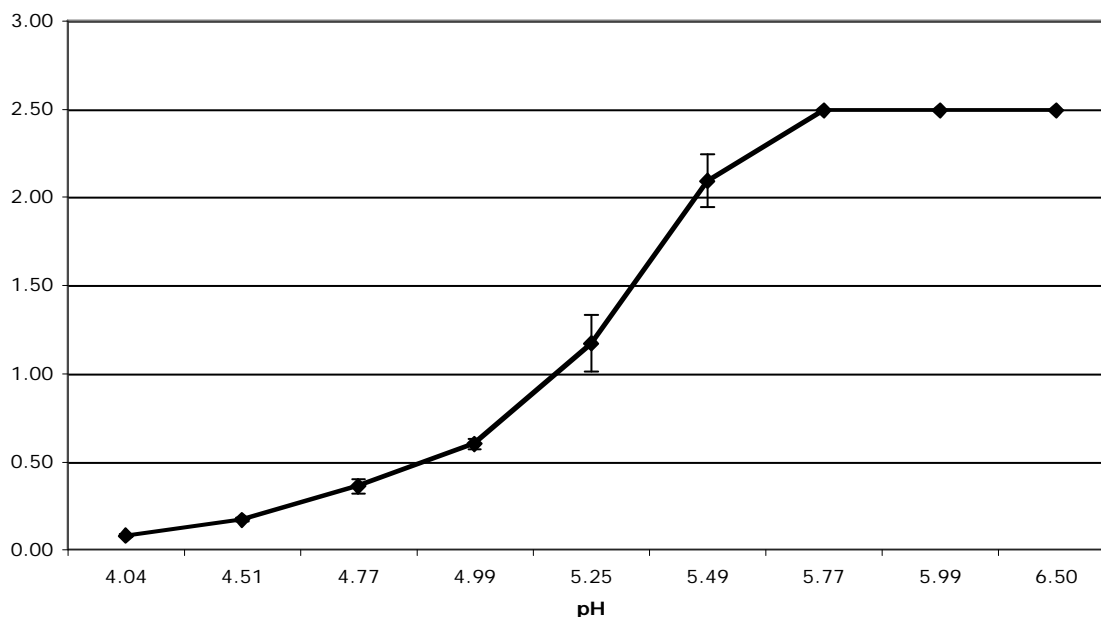

**Figure S1.** The pH curve for the colorimetric indicator dye chlorophenol red (2-chloro-4-[3-(3-chloro-4-hydroxyphenyl)-1,1-dioxobenzo[c]oxathiol-3-yl]phenol). Chlorophenol red has a narrow visual transition interval over a pH range from 4.8 (yellow) to 6.4 (red). A) Image of indicator color over the range of pH = 4.0-6.5 in a 48 well microtiter plate. B) Quantitative measurement of pH change over the range of pH = 4.0-6.5 as measured by optical density (O.D.) 574 mM (absorbance maxima). Data presented were the mean of triplicate assays. Errors bars indicate the standard error of the mean.
