# Supplementary material
Source: PubMed Central journal article supplement (PMC2330286)
Supplement: plntphys_pp.108.116889_2.pdf [file plntphys_pp.108.116889_2.pdf]

**Table S1:** Primer sets and conditions used for semi-quantitative RT-PCR analyses.

| <b>Name</b>            | <b>GenBank<br/>Acc. No.</b> | <b>Sequence (5'-&gt;3')</b>                       | <b>Annealing<br/>Temperature<br/>(°C)</b> | <b>Number<br/>of<br/>Cycles</b> |
|------------------------|-----------------------------|---------------------------------------------------|-------------------------------------------|---------------------------------|
| McPPCK1-F<br>McPPCK1-R | AF158091                    | TCTACTCAGGCAAGGGATTTG<br>GAACAAGAAGCTGGCCCAGAA    | 55                                        | 22                              |
| McPPC1-F<br>McPPC1-R   | X13660                      | CACTTAAACATGTCCTTGAG<br>GAGCACACAGCAACAAAGA       | 50                                        | 20                              |
| McPGM2-F<br>McPGM2-R   | BG269256                    | CGAAACAGGGATAAGAAACC<br>CAATGCTACTTGGGCATCC       | 55                                        | 22                              |
| McGPT2-F<br>McGPT2-R   | AB190772                    | CACTGTGTAGTCTCAAGGTTTTTG<br>GCAAACGGTGTAAGGAGCAAC | 55                                        | 22                              |
| McUBQ-F<br>McUBQ-R     | AF053563                    | TACTGGAAAGACTATCACCC<br>ATGCCTCCCCTCAAACGA        | 58                                        | 22                              |
